# Supplementary material
Source: HighWire-hosted journal article supplement (http://www.qdcxjkg.com/highwire/filestream/121512/field_highwire_adjunct_files/9/ERJ-00159-2015_Supplement.pdf)
Supplement: ERJ-00159-2015_Supplement.pdf [file ERJ-00159-2015_Supplement.pdf]

## Online supplementary material

**(Differential release and deposition of S100A8/A9 proteins in inflamed upper airway tissue)**

**Koen Van Crombruggen PhD<sup>1\*</sup>, Thomas Vogl PhD<sup>2</sup>, Claudina Pérez-Novo PhD<sup>1</sup>, Gabriele Holtappels B.Tech<sup>1</sup>, Claus Bachert MD PhD<sup>1,3</sup>,**

<sup>1</sup>Upper Airway Research Laboratory, Department of Otorhinolaryngology, Ghent University Hospital, Ghent, Belgium, <sup>2</sup>Institute of Immunology, University of Muenster, Muenster, Germany, <sup>3</sup>Division of ENT Diseases, CLINTEC, Karolinska Institutet, Stockholm, Sweden

\*Author for correspondence:

**Koen Van Crombruggen, Upper Airway Research Laboratory, Department of Otorhinolaryngology, Ghent University Hospital, De Pintelaan 185, 9000 Gent, Belgium  
e-mail: koen.vancrombruggen@ugent.be**

## 31 **METHODS**

### 32 **Patients**

33 Tissues, sera and nasal secretions were obtained at the Department of Otorhinolaryngology,  
34 Ghent University Hospital, Belgium during routine endonasal sinus surgery and approved by  
35 the local ethical committee. All patients gave their written informed consent before collecting  
36 material. All patients stopped oral and topical application of corticosteroids for at least  
37 1 month before surgery. The diagnosis of chronic rhinosinusitis with nasal polyps was based  
38 on history, clinical examination, nasal endoscopy, and computed tomography (CT) of the  
39 paranasal cavities according to the current European[1, 2] and American Guidelines.[3] Nasal  
40 tissue (inferior turbinates) of subjects without chronic rhinosinusitis undergoing septoplasty  
41 because of anatomical variations or trauma served as controls. The patients' atopy status was  
42 assessed by means of a skin prick test (SPT) to common aeroallergens (histamine; positive  
43 control, saline; negative control, hazel, alder, birch, plane, cipres, grasses, olive, Artemesia,  
44 Ambrosia, Alternaria Alternata, Cladosporium, Aspergillus, . Parietaria, cat, dog, Derm.  
45 Pteronyssinus, Derm. Farinae, Blatella). CT scans were graded according to the Lund-  
46 MacKay method, yielding a final score that could range from 0 (complete lucency of all  
47 sinuses) to 24 (complete opacity of all sinuses).[4] Polyps were graded by size and extent in  
48 both the left and right nasal fossa on a scale of 0 to 3 (no symptoms, mild, moderate, severe),  
49 according to the Davos classification, and summed for both sides to give a bilateral score  
50 ranging from 0 to 6.[5] The patient groups' full clinical profile can be found in Table 1 of the  
51 main document. In Table E1 of the online supplementary material, the clinical data of the  
52 patients are provided in separate groups arranged per sample type (tissue, serum, nasal  
53 secretions).

54

### 55 **Nasal secretions**

56 Nasal secretions were obtained by means of sinus packings (IVALON 4000 plus; 4.5 x 1.5 x  
57 2.0 cm, Surgical Products M-Pact, Eudora, KS) that were placed bilaterally between the  
58 inferior turbinate and the septum for 5 minutes. The quantity of secretions collected was  
59 determined by comparing the weight of the sinus packings before and after insertion. Then, 3  
60 mL of 0.9% NaCl solution was added to a tube containing the sinus packings and left at 4°C  
61 for 2 h, after which suspensions were centrifuged at 1,500 g for 10 minutes at 4°C. Aliquots  
62 were prepared and stored at -80°C for further analysis.

63

## 64 **Tissue homogenates**

65 Snap-frozen tissue specimens were weighed and suspended in a 10 times volume of 0.9%  
66 NaCl solution with protease inhibitor Complete Roche (Mannheim, Germany). Frozen tissue  
67 fragments were pulverized by means of a mechanical TissueLyser LT (Qiagen, Hilden,  
68 Germany) at 50 oscillations per second for 2 minutes in pre-chilled eppendorfs. The tissue  
69 homogenates were centrifuged at 15000 rpm for 5 minutes at 4°C and the supernatants were  
70 stored at -20°C until further analysis.

71

## 72 **S100A8, S100A9 and S100A8/A9 ELISA**

73 Commercially available ELISA kits (BMA Biomedicals, Augst, Switzerland) were used to  
74 measure S100A8, S100A9 and S100A8/A9 protein levels. The S100A8 ELISA uses a  
75 combination of two discriminating monoclonal antibodies (clones 8-5C2 and S13.67), while  
76 the S100A9 ELISA uses clones S36.48 and S32.2, recognizing different epitopes on the same  
77 subunit, and designed in such a way that it yields high specificity for S100A8 and S100A9  
78 proteins respectively, recognizing monomeric (an unstable form that does not occur *in vivo*)  
79 and homodimeric proteins but not the heterodimeric form. The heterodimeric S100A8/A9  
80 ELISA uses a monoclonal antibody (clone 27E10) that recognizes an epitope that is only  
81 present on the heterocomplex.

82 As a proof of concept, some of our results could indeed confirm the selectivity of these  
83 ELISA kits; for example, non-selective detection of heteromeric S100A8/A9 proteins in  
84 human sinosnasal tissue homogenates with the S100A8 and S100A9 ELISA kits can be  
85 excluded because in the ex-vivo experiments on isolated human granulocytes -where we  
86 applied *S aureus*- we measured a mean concentration of approximately 110µg/ml S100A8/A9  
87 with the S100A8/A9 kit (Fig E7; samples were 1000 times diluted to fit within the upper  
88 concentration range being to 200 ng/ml for this kit), while all these samples (undiluted) were  
89 below the detection limit of 0.3 ng/ml in both the S100A8 and S100A9 ELISA kit (results  
90 section in main document). A similar situation is true for the human upper airways tissue  
91 experiments as shown in Fig 6 A and B. The S100A8/A9 proteins that are present in the  
92 supernatants (panel A, left part) were not measurable with the S100A9 ELISA kit (panel B,  
93 left part) and S100A8 ELISA kit (reported in the results section of the main document and in  
94 the legend of Fig 6). The results on the tissue pellets from the same data set and from the data  
95 on serum and nasal secretions also show that the S100A8 ELISA kit did not detect S100A9  
96 because no proteins at all could be measured with this kit in these samples (reported in the

97 results sections of the main document and the online supplementary material) while they  
98 clearly contain S100A9 proteins (Fig 6 B, right part and Fig E1, A).

99

### 100 **S100A8, S100A9 and S100A8/A9 immunohistochemistry**

101 Human sinonasal tissues were fixated in formalin (Fluka, Sigma-Aldrich, Bornem, Belgium)  
102 and embedded in paraffin. Paraffin sections (4-5  $\mu\text{m}$ ) were air-dried for 24 hours at 37°C.  
103 After deparaffinization in parasolve, endogenous peroxidase activity was blocked with 0.3%  
104 hydrogen peroxidase in TRIS-buffered saline (TBS; pH 7.8) containing 0.001%  $\text{NaN}_3$  for 20  
105 minutes at room temperature. For frozen section, sections were fixed in ice-cold acetone for  
106 10 min and allowed to dry for 2 h. Both the frozen acetone-fixed and the deparaffinized  
107 formaline-fixed sections were washed with TBS for 10 minutes before being incubated  
108 overnight at 4°C with monoclonal Abs against S100A8 (clone S13.67; BMA Biomedicals,  
109 Augst, Switzerland), S100A9 (clone IDCPI; Santa Cruz Biotechnology, Santa Cruz, CA) and  
110 S100A8/A9 (clone 27E10; BMA Biomedicals), or with polyclonal Abs against S100A8 and  
111 S100A9 (generated by Dr T. Vogl, Institute of Immunology, University of Muenster), or the  
112 respective isotype controls mouse  $\text{IgG}_1$  (clone DAK-GO1; Dako, Glostrup, Denmark) or  
113 rabbit  $\text{IgG}$  (Dako). All monoclonal Ab were used at a final concentration of 5 $\mu\text{g}/\text{ml}$   
114 TBS/5%BSA on paraffin section and at 1 $\mu\text{g}/\text{ml}$  on frozen sections, except for clone IDCPI  
115 against S100A9, which was used at 0.025  $\mu\text{g}/\text{ml}$  on frozen sections. The polyclonal Abs were  
116 used at 2 $\mu\text{g}/\text{ml}$  TBS/5% BSA on paraffin sections and at 1 $\mu\text{g}/\text{ml}$  on frozen sections. Next, the  
117 slides were washed for 10 minutes in TBS. Expression was detected using the LSAB+  
118 technique conjugated with peroxidase according to the Manufacturer's instructions (labeled  
119 streptavidin-biotin; Dako). The peroxidase activity was detected using AEC Substrate  
120 chromogen (Dako), which results in a red stained precipitate. Finally, sections were  
121 counterstained with Hematoxylin for 2 minutes, washed in running tap water, and mounted in  
122 Aquatex (VWR International). In paraffin sections, double stainings were also performed with  
123 the monoclonal Ab against S100A9 after an antibody against MPO (rabbit  $\text{IgG}$ ; 3 $\mu\text{g}/\text{ml}$ ;  
124 Dako); for MPO, the peroxidase activity was detected using DAB+ Substrate chromogen  
125 (Dako) which results in a brown stained precipitate. For S100A9, New Fuchsin (Dako) was  
126 used, yielding red stainings.

127 Quantitative evaluation of the S100 expression level was performed by means of Image J  
128 software 1.48v (developed at the National Institutes of Health). Five equal squares on one  
129 cryo-slide without hematoxylin counterstaining were analyzed for S100 protein staining  
130 intensity and extent; the average was calculated per slide. Six slides per subject group were

131 assessed in such a way; the means of these data yielded the final results as presented. The data  
132 are expressed as arbitrary protein expression levels presented as Box-and-Whisker plots  
133 showing the minimum and the maximum value, the lower and the upper quartile, and the  
134 median.

135

### 136 **S100A8 and S100A9 gene expression analysis**

137 Total RNA was extracted using an Aurum Total RNA Mini Kit (Bio- Rad Laboratories). One  
138 µg of total RNA was reverse-transcribed to generate first-strand cDNA using an iScript  
139 cDNA Kit (Bio-Rad Laboratories). Two µl of a 5 times dilution of each cDNA reaction mix  
140 was used as a template for real-time PCR amplification performed on a LightCycler LC480  
141 System (Roche) in the presence of 250 nM of forward and reverse primers, and 1X PCR  
142 Master mix (Roche) in a total reaction volume of 5 µl. The thermal cycling conditions were as  
143 follows: 95°C for 1 min, followed by 45 cycles of 3 s at 95°C, 30 sec at 60°C and 1 s at 72°C,  
144 and a dissociation curve analysis from 60°C to 95°C. β-actin (ACTB), hypoxanthine  
145 phosphoribosyltransferase 1 (HMBS-1) and elongation factor 1 (EF-1) were used as  
146 endogenous reference for normalization. Primer sequences for the ACTB and HMBS-1 were  
147 obtained from the public Real-Time PCR Primer and Probe Database of the Department of  
148 Medical Genetics, University of Ghent (<http://medgen.ugent.be/rtpimerdb>; RTPimerDB ID1  
149 for ACTB and ID4 for HMBS-1. The primers sequences (forward and reverse) for EF-1 are:  
150 CTGAACCATCCAGGCCAAAT and GCCGTGTGGCAATCCAAT; for S100A8:  
151 GCCAAGCCTAACCGCTATAA and CCCACCAGGTCTTCTGAAAG; for S100A9:  
152 GGCTTTGACAGAGTGCAAGA and AGGTGTTGATGATGGTCTCTATG. Relative  
153 changes in gene expression were determined based on the comparative  $C_t$  method as described  
154 before.[6]

155

### 156 **Human sinonasal *ex-vivo* tissue-cube fragment stimulation assay**

157 Fresh tissue fragments of human nasal polyps (+/- 0.9 mm<sup>3</sup>) of CRSwNP patients were  
158 suspended as 0.04 g tissue-cubes/ml tissue culture medium (TCM) into 48-well plates in a  
159 total volume of 0.5 ml/well. Individual wells received 1 or 5 µg/ml human S100A8, S100A9  
160 or S100A8/A9 proteins (provided by Dr T. Vogl, Institute of Immunology, University of  
161 Münster; see this article's online supplementary material for more detailed information) in the  
162 absence or presence of either a RAGE antibody that blocks the receptor-ligand interactions  
163 (10µg/ml; clone 176902; R&D systems, Minneapolis, Minn), a TLR4 functional blocking  
164 antibody (2µg/ml; clone HTA125; Abcam, Cambridge, UK), or the respective isotype

165 controls mouse IgG2b (clone 20116; R&D systems) and mouse IgG2a (clone MG2a-53;  
166 Abcam). The culture medium supernatants from the tissue-cube fragment stimulation assays  
167 were snap-frozen in liquid nitrogen and stored at -20°C until cytokine measurement.

168 In a separate set of experiments, where supernatants were sampled for S100A8/A9  
169 measurements, the tissue-cubes were cultured in the absence or presence of either 2 µg/ml  
170 anti-human CXCL8/IL-8 antibody (R&D systems) in order to neutralize IL-8 bioactivity or a  
171 normal goat IgG control (R&D systems), 10<sup>5</sup> colony forming units (cfu) of a clinical isolate of  
172 living or heat-killed frequent colonizers of the upper respiratory tract *Staphylococcus aureus*  
173 (*S. aureus*), or the bacterial products *S. aureus* enterotoxin B (SEB; 0.5µg/ml; Sigma-Aldrich,  
174 Bornem, Belgium), Lipoteichoic acid (LTA; 5 µg/ml) from *S. aureus* (Sigma-Aldrich) for 24  
175 h. The experiments with living *S. aureus* were also performed in the absence and presence of  
176 the *de novo* proteins synthesis inhibitor cycloheximide (10 µg/ml), the endoplasmic reticulum  
177 to Golgi complex transport inhibitor brefeldin A (100 ng/ml), the tubulin polymerization  
178 inhibitor demecolcine (1µM), and the actin polymerization/reversible phagocytosis inhibitor  
179 cytochalasin B (5µg/ml).

180

181

### 182 **Human S100A8, S100A9 and S100A8/A9 proteins**

183 S100A8/A9 proteins were isolated from human granulocytes, while the homodimers are  
184 recombinant proteins that were purified from *E. coli*. [7] The proteins were dialyzed against  
185 HBS-buffer in the presence of 0.01 mM DTT to avoid formation of artificial disulfide bridges.  
186 Possible endotoxin contaminations were excluded by a Pyrogen Plus Limulus Amebocyte  
187 Lysate assay (BioWhittaker, Walkersville, MD) and blocking experiments using 10µg/ml  
188 polymyxin B (PMB) sulfate (Sigma-Aldrich). Human nasal polyp tissue fragments were  
189 furthermore challenged with 1 ng/ml lipopolysaccharide (LPS) in the absence and presence of  
190 10µg/ml PMB in order to assess the efficacy of PMB.

191 Tissue cube supernatants of above experiments were assayed for IL1β and TNFα levels by  
192 means of Luminex xMAP technology using the Fluorokine MAP Multiplex Human Cytokine  
193 Panel A kit (R&D Systems) on a Bio-Plex™ 200 Array Reader (Bio-Rad, Hercules, CA,  
194 USA).

195

196

197

198 **PBMC and granulocyte isolation**

199 Whole blood was routinely centrifuged over a Biocoll separating solution (Biochrom AG,  
200 Berlin) according to the manufacturer's guidelines. PBMCs were collected from the  
201 interphase. The bottom layer, containing granulocytes, was further treated by sequential  
202 hypotonic saline washes until all of the erythrocytes present were lysed.

## 203 **RESULTS**

204

### 205 **S100A8, S100A9 and S100A8/A9 protein levels in serum and nasal secretions of**

### 206 **CRSwNP and tissue of CRSsNP**

207 S100A8/A9 was found to be significantly more present in serum (Fig E1, A) and nasal  
208 secretions (Fig E1 B) of CRSwNP patients than in controls. In serum and nasal secretions, the  
209 median levels of S100A9 were not significantly different from those in controls (8.52 ng/ml;  
210 range 4.99-19.89 ng/ml vs. 7.17 ng/ml; range 3.95-10.87 ng/ml and 333.03 ng/ml; range  
211 120.68-819.81 ng/ml vs. 368 ng/ml; range 121.90-851.97 ng/ml, respectively) while the levels  
212 of S100A8 were too low to yield trustable data for analysis (data not shown).

213 S100A8 and S100A9 levels in ethmoidal tissue from CRSsNP patients were not significantly  
214 different from those in controls (median 70.2 ng/ml; range 0.0-668.3 ng/ml vs. 55.0 ng/ml;  
215 range 0.0-499.5 ng/ml and 1247 ng/ml; range 236.7-4340.2 ng/ml vs. 1089 ng/ml; range  
216 143.2-4171.6 ng/ml, respectively) while S100A8/A9 levels were significantly increased  
217 compared with control inferior turbinate (median 59.8 µg/ml; range 19.9-137.6 µg/ml vs. 37.0  
218 µg/ml; range 4.5-133.9 µg/ml,  $p<0.05$ ) but remaining significantly lower than observed in  
219 CRSwNP tissue (Fig 1 C,  $P<0.01$ ).

220

### 221 **S100A8, S100A9 and S100A8/A9 immunohistochemistry**

222 In contrast with the very pronounced S100A9 immunoreactivity of the ECM structures in  
223 human nasal polyps tissue from CRSwNP patients (Fig 3, C in this article's main document),  
224 acetone-fixed cryo-sections showed no or very locally limited S100A9 immunoreactivity in  
225 ethmoidal tissue of CRSsNP patients (Fig E2, A). Similar to CRSwNP (Fig 3, E<sub>1</sub> and F<sub>2</sub> in  
226 this article's main document), in formalin-fixed paraffin sections from CRSsNP tissue, the  
227 same antibody against S100A9 clearly stained neutrophils (Fig E2, B).

228 S100A8/A9 stainings with a monoclonal Ab (clone 27E10) only worked in acetone-fixed  
229 sections, showing almost no immunoreactivity in control tissue (Fig E2, C), while staining  
230 both ECM structures and inflammatory infiltrates in CRSwNP tissues (Fig E2, D<sub>1</sub>) but only  
231 inflammatory cells in CRSsNP tissues (Fig E2, D<sub>2</sub>).

232 Mouse IgG<sub>1</sub> isotype and rabbit IgG controls (data not shown) yielded no immunosignals in  
233 both cryo (Fig E2, E<sub>1</sub>) and paraffin (Fig E2, E<sub>2</sub>) sections of human polyp tissue.



234

235

236 **Human S100A8, S100A9 and S100A8/A9 proteins**

237 The endotoxin levels in the recombinant S100 proteins were confirmed to be extremely low  
238 and were at least less than 5 pg LPS/1 µg S100 protein. Any functional effect potentially  
239 mediated by traces of LPS in our assay was furthermore excluded as the proinflammatory  
240 responses by 5µg/ml S100A8 and S100A9 were not different in the absence or presence of 10  
241 µg/ml PMB (Fig E5). On the other hand, 10 µg/ml PMB abolished the effects of 1 ng/ml LPS  
242 almost completely (Fig E6) on IL1β and TNFα release. Because 1 ng/ml LPS induced a  
243 response that was comparable in magnitude to the response by 5µg/ml S100A8 and 5µg/ml  
244 S100A9 on IL1β and TNFα levels, while it exceeds at least 20 times the maximal possible  
245 LPS contamination that can be present in 5µg/ml S100 proteins, furthermore indicating that a  
246 functional effect by traces of LPS in our assay can be excluded.

247

248

249

## 250 **FIGURE CAPTIONS**

251 **FIG E1.** Quantification of S100A8/A9 protein levels in serum (**A**), and nasal secretions (**B**) by  
252 means of ELISA in controls and CRSwNP. Values are expressed as  $\mu\text{g/g}$  tissue or  $\mu\text{g/ml}$   
253 serum/nasal secretion and presented as scatter plots showing the median as a line. \* $P < 0.05$ ;  
254 \*\*\* $P < 0.001$ . The corresponding patients' clinical data can be found in Table 1 of the main  
255 document and table E1 of this online supplementary material.

256

257

258 **FIG E2.** Immunolabeling on acetone-fixed cryo-sections (**A, F<sub>1</sub>**) and paraffin sections (**B, C,**  
259 **D, E, F<sub>2</sub>**) with antibodies directed against S100A9 in ethmoidal mucosa from a CRSsNP  
260 patient (**A and B**) and against the S100A8/A9 heteromer (**C and D**) in inferior turbinate tissue  
261 (IT) from a control subject (**C**), in a nasal polyp (NP) from a CRSwNP patient (**D<sub>1</sub>**), and in  
262 ethmoidal mucosa from a CRSsNP patient (**D<sub>2</sub>**). Isotype IgG<sub>1</sub> on cryo (**E<sub>1</sub>**) and paraffin (**E<sub>2</sub>**)  
263 sections showed no staining. (magnification x 200).

264

265

266 **FIG E3.** S100A8 (**A**) and S100A9 (**B**) mRNA expression in sinonasal tissue of controls  
267 (inferior turbinates) and CRSwNP (nasal polyps) patients. Data are expressed as normalized  
268 relative copy number and presented as scatter plots showing means as a line with standard  
269 error of the mean.

270

271 **FIG E4.** Effect of exogenously added  $5\mu\text{g/ml}$  S100A8, S100A9 and S100A8/A9 proteins on  
272 the release of IL-6 (**A**), TGF- $\beta$  (**B**) and ECP (**C**) from human nasal polyp tissue in an ex-vivo  
273 tissue assay. Data are presented as Box-and-Whisker plots showing the minimum and the  
274 maximum value, the lower and the upper quartile, and the median (n=6).

275

276 **FIG E5.** Potential functional effects mediated by traces of LPS in our ex-vivo CRSwNP  
277 tissue responses were excluded as IL-1 $\beta$  (**A and B**) and TNF- $\alpha$  (**C and D**) release by  $5\mu\text{g/ml}$   
278 S100A8 (**A and C**) and S100A9 (**B and D**) were not different in the absence or presence of  
279  $10\mu\text{g/ml}$  polymyxin B (PMB). Data are presented as Box-and-Whisker plots showing the  
280 minimum and the maximum value, the lower and the upper quartile, the median (as a line),  
281 and the mean (as a cross) (n=6).

282

283 **FIG E6.**  $10\mu\text{g/ml}$  polymyxin B (PMB) abolished the effects of  $1\text{ng/ml}$  LPS on IL-1 $\beta$  and  
284 TNF- $\alpha$  release. Data are presented as Box-and-Whisker plots showing the minimum and the

285 maximum value, the lower and the upper quartile, the median (as a line), and the mean (as a  
286 cross) (n=6). \*P < 0.05; \*\*P < 0.01.

287

288 **FIG E7.** Effect of exogenously added  $10^5$  cfu *S. aureus* on the release of S100A8/A9 proteins  
289 (left axis) and on cell death assessed as the level of lactate dehydrogenase (LDH) in the  
290 supernatants (right axis) from isolated human granulocytes ( $2 \cdot 10^6$  cell/ml). HI means heat  
291 inactivated *S. aureus*. Data are means  $\pm$  S.E.M. (n=5). \*\*P < 0.01.

292

293 **FIG E8.** Evaluation of the effect of  $10^5$  cfu *S. aureus* on cell death in our *ex-vivo* tissue assay,  
294 assessed as levels of lactate dehydrogenase (LDH) in the supernatants. HI means heat  
295 inactivated *S. aureus*. Data are means  $\pm$  S.E.M. (n=6-7).

296

297 **FIG E9.** Effect of inhibition of *de novo* proteins synthesis (10  $\mu$ g/ml cycloheximide),  
298 endoplasmic reticulum-Golgi complex protein transport (100 ng/ml brefeldin A), tubulin  
299 polymerization (1 $\mu$ M demecolcine), and actin polymerization (5 $\mu$ g/ml cytochalasin B) on the  
300 release of S100A8/A9 induced by  $10^5$  cfu *S. aureus* in a human nasal polyp tissue *ex-vivo*  
301 tissue assay. Data are means  $\pm$  S.E.M. (n=7). # P < 0.05 vs. baseline without *S. aureus*; \*P <  
302 0.05 vs. baseline with *S. aureus*.

303

304

305

306 **REFERENCES**

307

308 1 Fokkens W, Lund V, Mullol J. European position paper on rhinosinusitis and nasal polyps 2007.  
309 *Rhinol Suppl* 2007; 1-136.

310 2 Thomas M, Yawn BP, Price D, Lund V, Mullol J, Fokkens W. EPOS Primary Care Guidelines:  
311 European Position Paper on the Primary Care Diagnosis and Management of Rhinosinusitis and  
312 Nasal Polyps 2. *Prim Care Respir J* 2008 Jun; 17: 79-89.

313 3 Meltzer EO, Hamilos DL, Hadley JA, *et al.* Rhinosinusitis: establishing definitions for clinical  
314 research and patient care. *J Allergy Clin Immunol* 2004 Dec; 114: 155-212.

315 4 Lund VJ, Kennedy DW. Staging for rhinosinusitis. *Otolaryngol Head Neck Surg* 1997 Sep; 117:  
316 S35-S40.

317 5 Fokkens W, Lund V, Bachert C, *et al.* EAACI Position Paper on Rhinosinusitis and Nasal Polyps  
318 Executive Summary. *Allergy* 2005 May 12; 60: 583-601.

319 6 Livak KJ, Schmittgen TD. Analysis of Relative Gene Expression Data Using Real-Time  
320 Quantitative PCR and the 2- $[\Delta\Delta]CT$  Method. *Methods* 2001 Dec; 25: 402-408.

321 7 Vogl T, Leukert N, Barczyk K, Strupat K, Roth J. Biophysical characterization of S100A8 and  
322 S100A9 in the absence and presence of bivalent cations. *Biochim Biophys Acta* 2006 Nov; 1763:  
323 1298-1306.

324

325
